# THE AMERICAN JOURNAL OF PSYCHIATRY

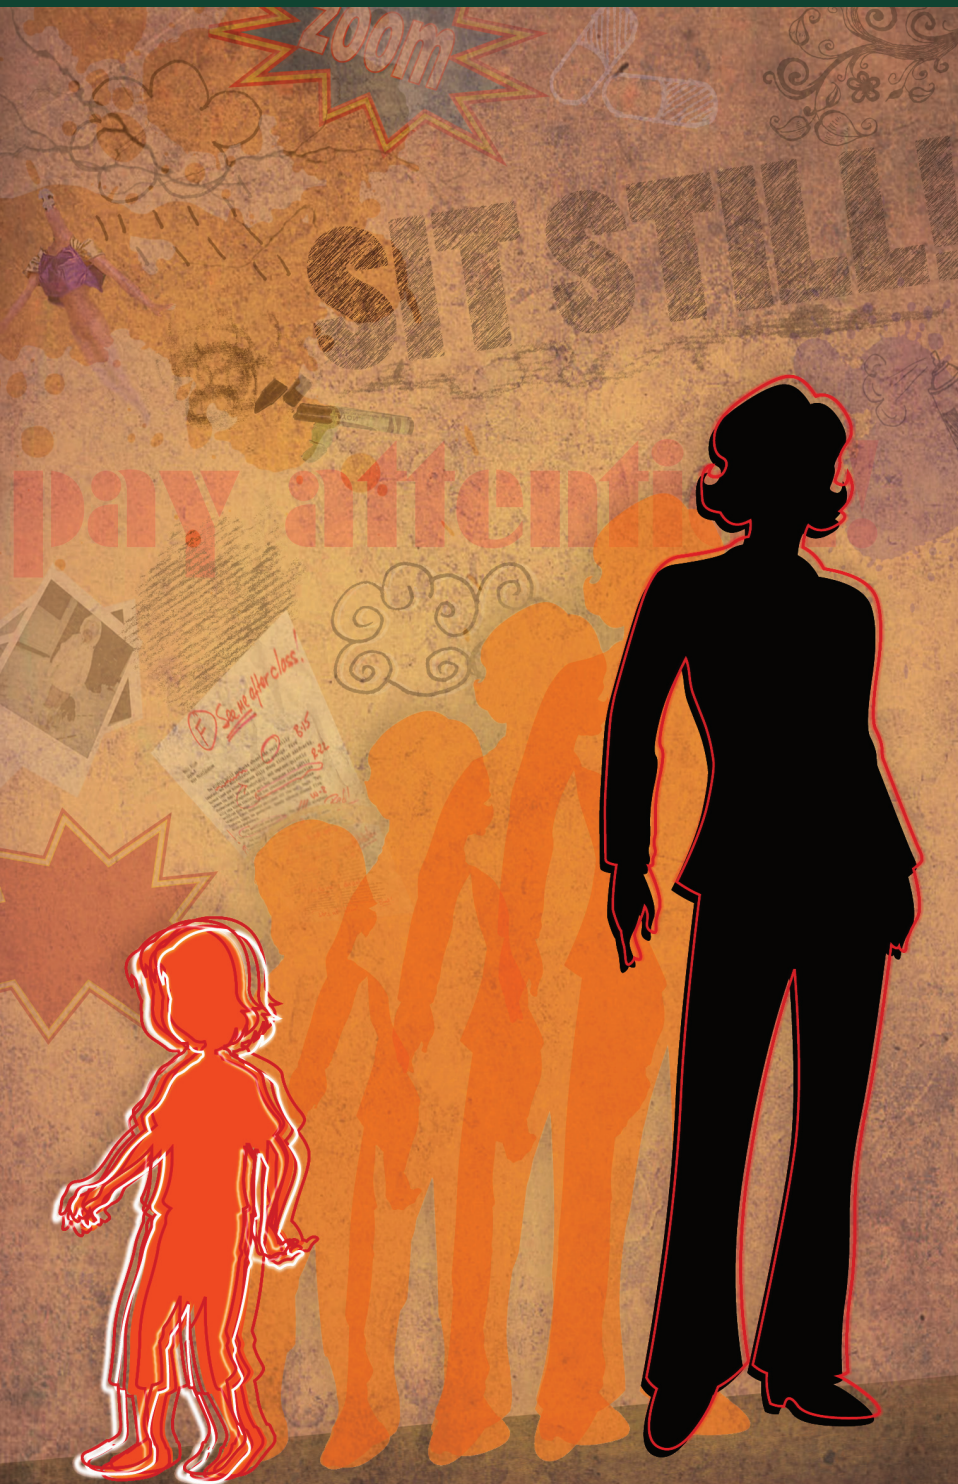

Teaching Trainees to Negotiate  
Research Collaborations With  
Industry: A Mentorship Model

David B. Merrill, M.D., et al. 381

Morphological Abnormalities of  
the Thalamus in Youths With  
Attention Deficit Hyperactivity  
Disorder

Iliyan Ivanov, M.D., et al. 397

◀ Adult Psychiatric Outcomes of Girls  
With Attention Deficit Hyperactivity  
Disorder: 11-Year Follow-Up in a  
Longitudinal Case-Control Study

Joseph Biederman, M.D., et al. 409

Project Among African- Americans  
to Explore Risks for Schizophrenia  
(PAARTNERS): Evidence for  
Impairment and Heritability of  
Neurocognitive Functioning in  
Families of Schizophrenia Patients

Monica E. Calkins, Ph.D., et al. 459

Continuing Medical Education 483

April 2010

Volume 167 • Number 4

---

Official Journal of the  
AMERICAN PSYCHIATRIC ASSOCIATION

---

[ajp.psychiatryonline.org](http://ajp.psychiatryonline.org)
