# THE AMERICAN JOURNAL OF PSYCHIATRY

SNEAK  
PEEK

JUNE  
2010  
ISSUE

## SNEAK A PEEK INTO PSYCHIATRY'S FUTURE AT THE APA ANNUAL MEETING

Have you ever wondered about the decision-making process used to determine which studies are published by *The American Journal of Psychiatry*?

At APA's 2010 annual meeting in New Orleans, you'll get some insight into the answer in a symposium led by AJP Editor Robert Freedman, M.D. He will use the upcoming June issue to explain how submission decisions are made as he highlights important research reported in that issue to be released the following week. Authors of papers that will be appearing in the June issue will also be on hand to present overviews of their findings.

Be a part of this exciting event in New Orleans!

Symposium 47: New Studies to Appear in the June Issue of *The American Journal of Psychiatry*: Presentations by the Authors and Editors

Chair: Robert Freedman, M.D.

Monday, May 24: 2:00 p.m.-5:00 p.m.

Rooms 225/226, Second Level, Morial Convention Center

### AMONG THE PRESENTERS

**David Spiegel**, discussing evidence for a dissociative subtype of PTSD

**Mary Zanarini**, discussing recovery from borderline personality disorder and its stability

**Alexandre Dombrovski**, discussing reward/punishment reversal learning in older suicide attempters

*Other articles of note in the June issue:*

A Double-Blind, Placebo-Controlled Trial That Combines Sertraline and Naltrexone for Treating Co-Occurring Depression and Alcohol Dependence

International Consensus Study of Antipsychotic Dosing

# THE AMERICAN PSYCHIATRIC ASSOCIATION

1000 Wilson Blvd., Suite 1825, Arlington, VA 22209-3901  
(888) 357-7924 (toll-free inside the U.S. and Canada) / (703) 907-7300  
web site: [www.psych.org/](http://www.psych.org/) e-mail: [apa@psych.org](mailto:apa@psych.org)

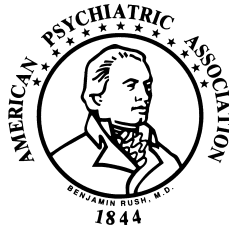

## OFFICERS 2009–2010

|                     |                                 |
|---------------------|---------------------------------|
| President           | Alan F. Schatzberg, M.D.        |
| President-Elect     | Carol A. Bernstein, M.D.        |
| Vice-President      | Jeffrey L. Geller, M.D., M.P.H. |
| Secretary-Treasurer | David Fassler, M.D.             |

## ASSEMBLY

|               |                           |
|---------------|---------------------------|
| Speaker       | Gary S. Weinstein, M.D.   |
| Speaker-Elect | Bruce A. Hershfield, M.D. |
| Recorder      | Ann Marie Sullivan, M.D.  |

## MEDICAL DIRECTOR'S OFFICE

|                          |                            |
|--------------------------|----------------------------|
| Medical Director and CEO | James H. Scully, Jr., M.D. |
|--------------------------|----------------------------|

## BOARD OF TRUSTEES

|                           |                                  |
|---------------------------|----------------------------------|
| Becky Bay, M.D.           | Carolyn B. Robinowitz, M.D.      |
| Thomas K. Ciesla, M.D.    | Pedro Ruiz, M.D.                 |
| Mary Helen Davis, M.D.    | Jacqueline N. Smith, M.D.        |
| Melinda G. Fierros, M.D.  | Joyce A. Spurgeon, M.D.          |
| Dilip V. Jeste, M.D.      | Frederick J. Stoddard, Jr., M.D. |
| James E. Ninger, M.D.     | Nada L. Stotland, M.D., M.P.H.   |
| Roger Peele, M.D.         | John Chapman Urbaitis, M.D.      |
| Kayla M. Pope, M.D., J.D. | John J. Wernert III, M.D.        |
|                           | William M. Womack, M.D.          |

**A11 Editorial Board**

**A13 Highlights of this issue**

**Editorials**

**255 Should our major classifications of mental disorders be revised?**

D. Goldberg

**257 Utility of computerised cognitive-behavioural therapy for depression**

G. Andrews

**Special article**

**259 Cognitive model of caregiving in psychosis**

E. Kuipers, J. Onwumere, and P. Bebbington

**265 Ethnic minorities and mental health services: developing a more sustainable approach – extra**

Ovais F. Badat

**Review article**

**266 Efficacy and acceptability of mood stabilisers in the treatment of acute bipolar depression: systematic review**

R.J. Van Lieshout and G.M. MacQueen

**Papers**

**274 Autism, ethnicity and maternal immigration**

D.V. Keen, F.D. Reid, and D. Arnone

**281 Origami – poems by doctors**

Arthur Clark

**282 Social communication deficits in disruptive primary-school children**

R. Donno, G. Parker, J. Gilmour, and D.H. Skuse

**290 Outcomes of occasional cannabis use in adolescence: 10-year follow-up study in Victoria, Australia**

L. Degenhardt, C. Coffey, J.B. Carlin, W. Swift, E. Moore, and G.C. Patton

**296 Duration of untreated illness and outcome in schizophrenia: test of predictions in relation to relapse risk**

D.C. Owens, E.C. Johnstone, P. Miller, J.F. Macmillan, and T.J. Crow

**302 Burden of chronic physical conditions and mental disorders in primary care**

A. Fernandez, J.A.B. Saameño, A. Pinto-Meza, J.V. Luciano, J. Autonell, D. Palao, L. Salvador-Carulla, J. Garcia Campayo, J.M. Haro, A. Serrano, and the DASMAP investigators

**309 Psalm 38: A man with major depression – psychiatry in the Old Testament**

George Stein

**310 Economic evaluation of online computerised cognitive-behavioural therapy without support for depression in primary care: randomised trial**

S.A.H. Gerhards, L.E. de Graaf, L.E. Jacobs, J.L. Severens, M.J.H. Huibers, A. Arntz, H. Ripper, G. Widdershoven, J.F.M. Metsemakers, and S.M.A.A. Evers

**319 Cost-effectiveness of a stepped care intervention to prevent depression and anxiety in late life: randomised trial**

P. van't Veer-Tazelaar, F. Smit, H. van Hout, P. van Oppen, H. van der Horst, A. Beekman, and H. van Marwijk

**325 Robert Schumann's contribution to the genetics of psychosis – psychiatry in music**

Katharina Domschke

**326 Early intervention in panic: pragmatic randomised controlled trial**

P. Meulenbeek, G. Willemse, F. Smit, A. van Balkom, P. Spinhoven, and P. Cuijpers

**Columns**

**332 Correspondence**

**333 Corrections**

**334 Book reviews**

**336 Contents of Advances in Psychiatric Treatment**

**337 Contents of the American Journal of Psychiatry**

**338 From the Editor's desk**

# The Residents' JOURNAL

Last Issue's

## Table of Contents

- 1 Psychiatry and Philosophy  
Anna Yusim, M.D.
- 2 Interview With  
Dr. Kenneth S. Kendler  
Anna Yusim, M.D.
- 4 Integration of Reason and  
Intuition: Is It Relevant to  
Everyday Life?  
Ricardo Cáceda, M.D., Ph.D.
- 6 Ethics and Professionalism  
in Medicine  
Nomi Levy-Carrick, M.D.,  
M.Phil.
- 8 The Philosophy of  
Nosology: Global Mental  
Health and Lessons from  
Cross-Cultural Psychiatry  
Gladys Reyes  
Helena Hansen, M.D., Ph.D.

The Residents' Journal is sent free-of-charge to all psychiatry residents. Anyone interested in being included on the distribution list should contact Angela Moore, the Residents' Journal staff editor at [ajp@psych.org](mailto:ajp@psych.org) with "Subscribe to Residents' Journal" in the subject line.

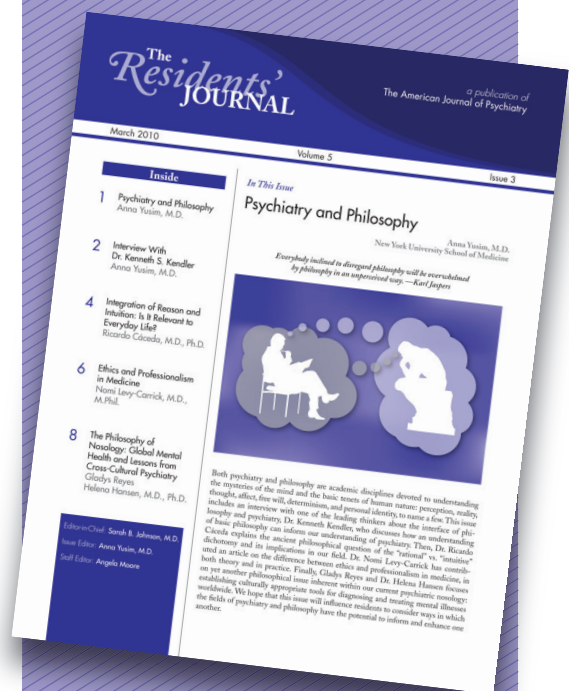

a publication of  
The American Journal of Psychiatry

# get CME from AJP

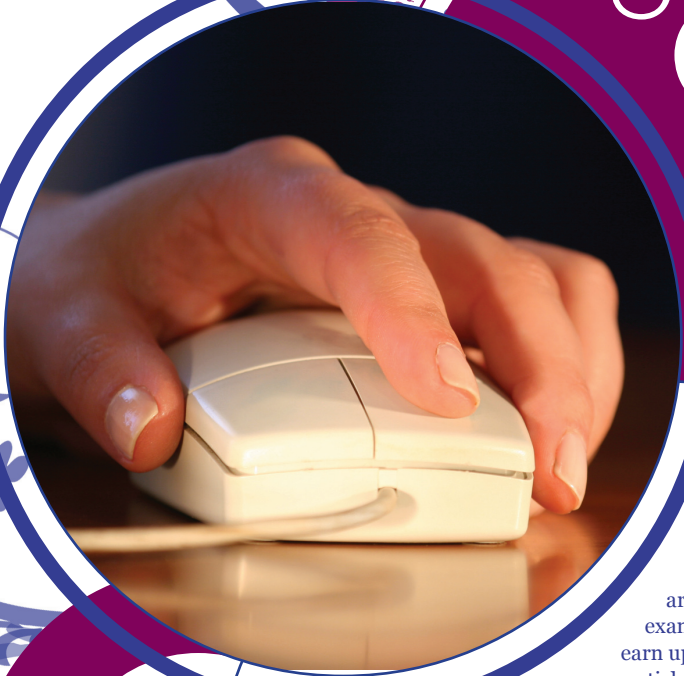

Brief companion exams are created for three of the most influential articles from each issue. By reading the articles and completing the online exams, you can test your knowledge and earn up to 1 *AMA PRA Category 1 Credit*<sup>™</sup> per article. Correct answers are highlighted for your reference upon completion of the course; there is no minimum threshold score necessary for the credit. A

link from the question to the correct answer in context will also be highlighted in the associated article, thus extending the learning experience.

CME credit is only provided online, and a subscription to the AJP CME program is required. From the moment you subscribe to the AJP CME program, you will be able to select from 72 courses from among 40 possible subject areas. You'll also be able to access the next 33 courses as they become available. For more information and pricing, please go to <http://cme.psychiatryonline.org/misc/aboutajpcme.shtml>

This activity is sponsored by the American Psychiatric Association. The American Psychiatric Association is accredited by the Accreditation Council for Continuing Medical Education to provide continuing medical education for physicians. The American Psychiatric Association designates each educational activity for a maximum of 1 *AMA PRA Category 1 Credit*<sup>™</sup>. Physicians should only claim credit commensurate with the extent of their participation in the activity.

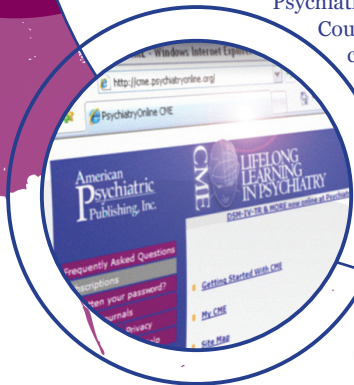

Fulfill your CME requirement while staying current on the latest advances in psychiatry.  
Subscribe to AJP CME!

# READ The American Journal of PSYCHIATRY ONLINE

## ONLINE BENEFITS

### AJP in Advance

Receive key research articles posted on the AJP website well in advance of their appearance in print.

### Back Issue Access

Gain access to back issues starting with Volume 1, Issue 1 of the American Journal of Insanity in 1844. (Available to institutions as a separate one-time purchase.)

### AJP CME

Take interactive quizzes that offer AMA PRA Category 1 Credits™ for selected articles from each issue (with paid subscription to the CME Course Program).

### AJP Audio

Listen to MP3-format program summarizing findings from key articles from each issue.

### Residents' Journal

Read additional AJP articles and features that have most value to residents in their training.

### Powerful Searching

Search by author, keyword, and/or citation details—within any one journal, across the entire PsychiatryOnline journal collection, or across all HighWire journals.

### PubMed, CrossRef, and Google Scholar links

Explore everything from cited references to abstracts and full text; to similar articles; to other articles by the same lead authors.

### eTOCs

Get advanced email alerts with the table of contents of the latest issue.

**ACTIVATE  
NOW!**

IT'S AS EASY AS...

**2** Under  
**SUBSCRIBE  
NOW**, click  
"Activate  
Your Online  
Access"

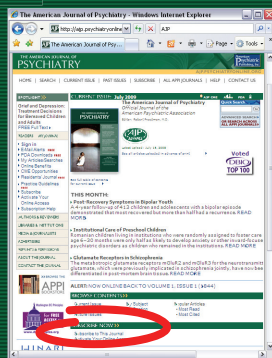

Go to [ajp.psychiatryonline.org](http://ajp.psychiatryonline.org)

**3** Enter your APA Member Number. (This can be found on your mailing label.)

AJP 3000056866 CAR-RT LOT88 C-105  
John Q Sample  
Mental Health Professional  
1000 Wilson Blvd STE 1825  
Arlington VA 22209-3924 01654

\*In most cases the number on your label will be your Member Number; if it is not, enter your APA Member Number (with enough leading zeros to create 10 digits).

For more information or if you cannot locate your customer number, please contact APPI Customer Service:

**1.800.368.5777  
APPI@PSYCH.ORG**

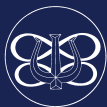

# Psychiatry and Clinical Neurosciences

**FREE  
ONLINE  
ACCESS**  
for February 2010  
issue

**Edited by:** Masatoshi Takeda and Hiroshi Kurita

**Frequency:** Bi-monthly

**Impact Factor:** 1.394\*

\*Thomson Reuters Journal Citation Reports, 2008, Science Edition®

## Volume 64 Number 1, February 2010

### 1 Editorial

*M. Takeda and H. Kurita*

### Regular Articles

**4 Deterioration of intelligence in methamphetamine-induced psychosis: Comparison with alcohol dependence on WAIS-III**

*S-K. Lin, M-C. Huang, H-C. Lin and C-H. Pan*

**10 Effects of emotionally charged sounds in schizophrenia patients using exploratory eye movements: Comparison with healthy subjects**

*Y. Ishii, K. Morita, Y. Shouji, Y. Nakashima and N. Uchimura*

**19 Effect of bromocriptine on antipsychotic drug-induced hyperprolactinemia: Eight-week randomized, single-blind, placebo-controlled, multicenter study**

*M-S. Lee, H-C. Song, H. An, J. Yang, Y-H. Ko, I-K. Jung and S-H. Joe*

**28 Risperidone in the treatment of mixed state bipolar patients: Results from a 24-week, multicenter, open-label study in Korea**

*Y. S. Woo, W-M. Bahk, D-I. Jon, S-K. Chung, S-Y. Lee, Y. M. Ahn, C-U. Pae, H-S. Cho, J-G. Kim, T-Y. Hwang, H-S. Lee, K. J. Min, K-U. Lee and B-H. Yoon*

**38 Trial of aripiprazole in the treatment of first-episode schizophrenia**

*H-Y. Lee, B-J. Ham, R-H. Kang, J-W. Paik, S-W. Hahn, M-S. Lee and M-S. Lee*

**44 Does daily Naikan therapy maintain the efficacy of intensive Naikan therapy against depression?**

*M. Sengoku, H. Murata, T. Kawahara, K. Imamura and K. Nakagome*

**52 Open wards versus locked wards of general hospitals in the treatment of psychiatric patients with medical comorbidities: A cross-sectional study in Tokyo**

*K. Hatta, C. Usui, H. Nakamura, H. Kurosawa and H. Arai*

**57 Mutation screening and assessment of the effect of genetic variations on expression and RNA editing of serotonin receptor 2C in the human brain**

*M. Bundo, K. Iwamoto, K. Yamada, T. Yoshikawa and T. Kato*

**62 Relationship of psychopathological symptoms and cognitive function to subjective quality of life in patients with chronic schizophrenia**

*K. Tomida, N. Takahashi, S. Saito, N. Maeno, K. Iwamoto, K. Yoshida, H. Kimura, T. Iidaka and N. Ozaki*

**70 Behavioral problems and parenting style among Taiwanese children with autism and their siblings**

*S. S-F. Gau, M-C. Chou, J-C. Lee, C-C. Wong, W-J. Chou, M-F. Chen, W-T. Soong and Y-Y. Wu*

**79 Clinical and pharmacologic risk factors for neuroleptic malignant syndrome and their association with death**

*Ü. Tural and E. Önder*

**88 Misalignments of rest-activity rhythms in inpatients with schizophrenia**

*M. Kodaka, S. Tanaka, M. Takahara, A. Inamoto, S. Shirakawa, M. Inagaki, N. Kato and M. Yamada*

### Short Communications

**95 Higher incidence of hysterectomy and oophorectomy in women suffering from clinical depression: Retrospective chart review**

*A. Mantani, H. Yamashita, T. Fujikawa and S. Yamawaki*

**99 Development of a clinical pathway for long-term inpatients with schizophrenia**

*M. Nakanishi, K. Sawamura, S. Sato, Y. Setoya and N. Anzai*

**104 Changes in metabolic parameters following a switch to aripiprazole in Japanese patients with schizophrenia: One-year follow-up study**

*H. Takeuchi, H. Uchida, T. Suzuki, K. Watanabe and H. Kashima*

### Letters to the Editor

107
